# Supplementary material for: Template-free approach to synthesize hierarchical porous nickel cobalt oxides for supercapacitors
Source: Royal Society of Chemistry journal article supplement (doi:10.1039/c2nr31725g), 2012-01-01
Supplement: c2nr31725g.pdf [file c2nr31725g.pdf]

Supplementary Material (ESI) for Nanoscale

This journal is (c) The Royal Society of Chemistry 2012

---

## **Template-free approach to synthesize hierarchical porous nickel cobalt oxides for supercapacitors**

*Jie Chang, Jing Sun\*, Chaohe Xu, Huan Xu, Lian Gao*

*The State Key Lab of High Performance Ceramics and Superfine Microstructure,  
Shanghai Institute of Ceramics, Chinese Academy of Sciences, 1295 Ding Xi Road,  
Shanghai 200050, China*

*E-mail address: jingsun@mail.sic.ac.cn (J. Sun)*

*Tel: +86-12-52414301. Fax: +86-21-52413122*

Supplementary Material (ESI) for Nanoscale

This journal is (c) The Royal Society of Chemistry 2012

## Electronic Supplementary Information (ESI)

### Supplementary Graphics

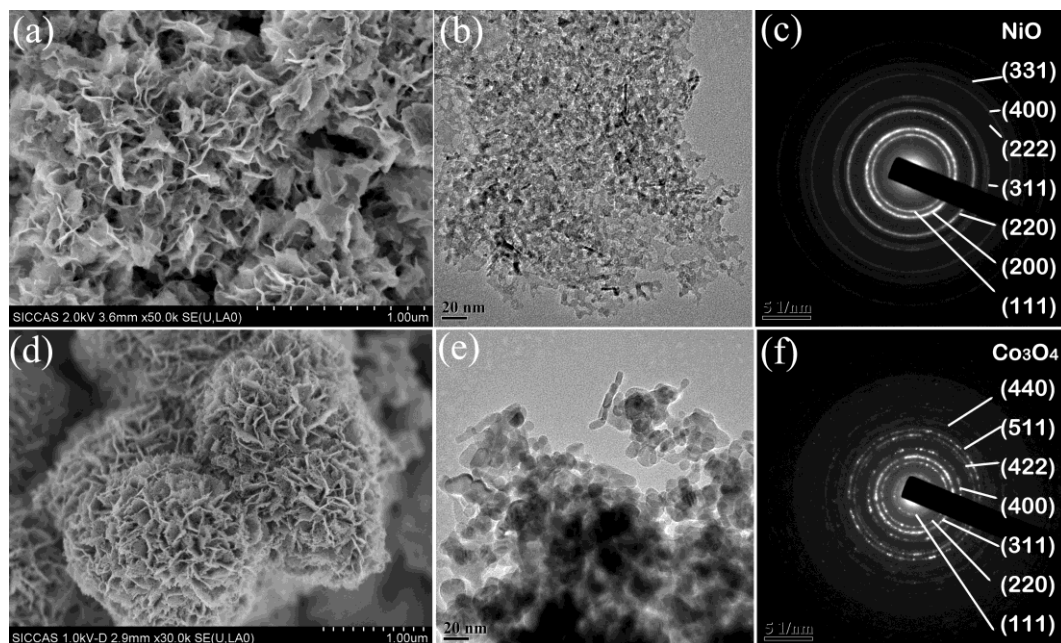

**Fig. S1** SEM (a, d) and TEM (b, e) images and SAED patterns (c, f) of NiO (a-c) and Co<sub>3</sub>O<sub>4</sub> (d-f)

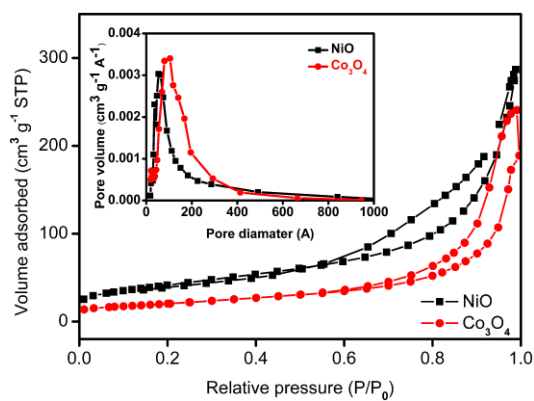

**Fig. S2** Nitrogen adsorption and desorption isotherms of NiO and Co<sub>3</sub>O<sub>4</sub>,

inset was pore size distribution curves

Supplementary Material (ESI) for Nanoscale

This journal is (c) The Royal Society of Chemistry 2012

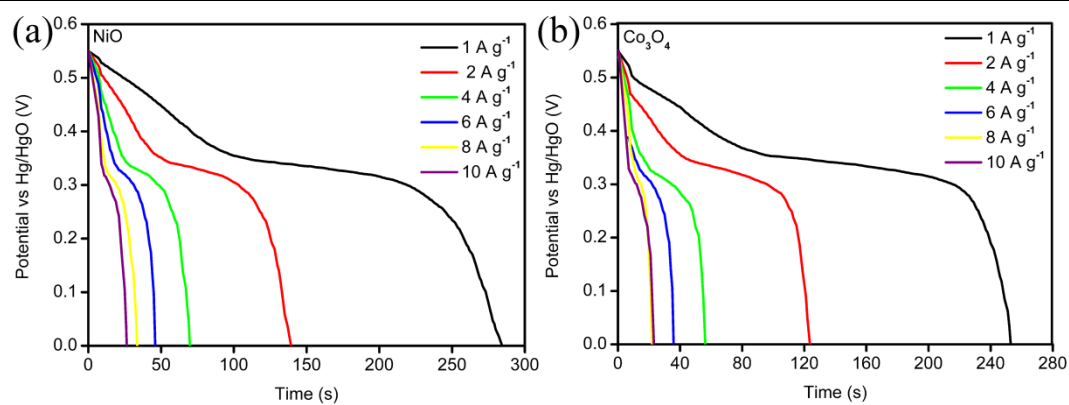

**Fig. S3** Galvanostatic discharge curves of NiO (a) and Co<sub>3</sub>O<sub>4</sub> (b) at various current densities in a potential range of 0-0.55V
